# Supplementary material for: CD8 T-Cells from Most HIV-Infected Patients Lack Ex Vivo HIV-Suppressive Capacity during Acute and Early Infection
Source: PubMed Central journal article supplement (PMC3612088; doi:10.1371/journal.pone.0059767), 2013-03-29

**Figure S1**

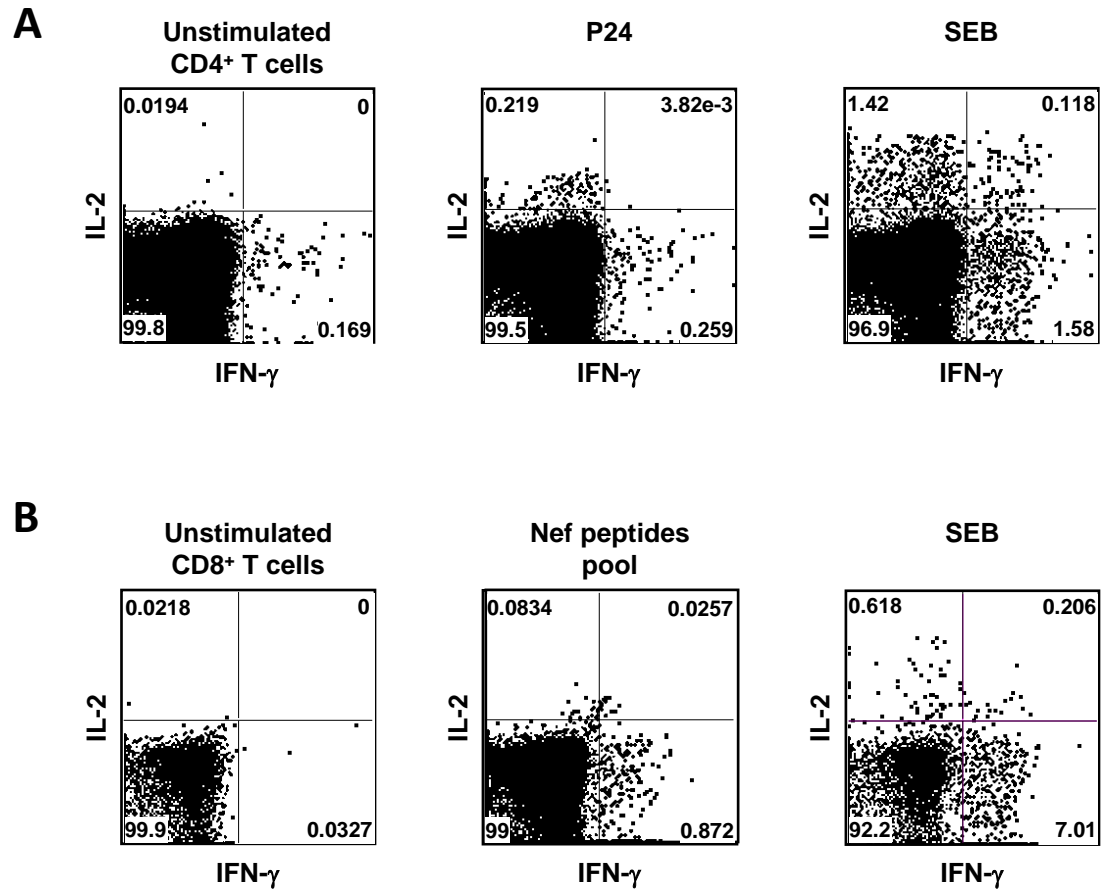

Supplement: pone.0059767.s001.pdf [file pone.0059767.s001.pdf]
