# Supplementary material for: CD8 T-Cells from Most HIV-Infected Patients Lack Ex Vivo HIV-Suppressive Capacity during Acute and Early Infection
Source: PubMed Central journal article supplement (PMC3612088; doi:10.1371/journal.pone.0059767), 2013-03-29
Supplement: pone.0059767.s002.pdf [file pone.0059767.s002.pdf]

# OPTIPRIM clinical trial

|                             |
|-----------------------------|
| Brigitte AUTRAN             |
| Ingrid BENARD               |
| Antoine CHERET              |
| Sandrine COUFFIN-CADIERGUES |
| Cécile GOUJARD              |
| Philippe HALFON             |
| Bruno HOEN                  |
| Alain LAFEUILLADE           |
| Caroline LASCoux-COMBE      |
| Annie LEPALEC               |
| Yann MAZENS                 |
| Laurence MEYER              |
| Georges NEMBOT              |
| Daniel OLIVE                |
| Gianfranco PANCINO          |
| Isabelle RAVAUx             |
| Christine ROUZIOUX          |
| Asier SAEZ-CIRION           |
| Juliette SAILLARD           |
| Bruno SPIRE                 |
| Catherine TAMALET           |
| Jean-Marc TRELUYER          |
| Alain VENET                 |

## CLINICAL CENTERS INCLUDING PATIENTS

| Center | Hospital                             | Place                     | PI                          |
|--------|--------------------------------------|---------------------------|-----------------------------|
| 25     | CHRU Saint Jacques                   | Besançon                  | Bruno HOEN                  |
| 30     | Hôpital St Louis                     | Paris                     | Caroline LASCoux-COMBE      |
| 34     | Hôpital Bicêtre                      | Kremlin-Bicêtre           | Cécile GOUJARD              |
| 36     | Hôpital Lariboisière                 | Paris                     | Agathe RAMI                 |
| 39     | CHR Aix en Provence                  | Aix en Provence           | Thierry ALLEGRE             |
| 48     | Centre médical de l'Institut Pasteur | Paris                     | Claudine DUVIVIER           |
| 49     | Hôpital Tenon                        | Paris                     | Laurence SLAMA              |
| 56     | Hôpital cochin                       | Paris                     | Dominique SALMON            |
| 59     | Hôpital Henri Mondor                 | Crétiel                   | Yves LEVY                   |
| 60     | Hôpital Pitié salpêtrière            | Paris                     | Christine KATLAMA           |
| 61     | Hôpital Pitié salpêtrière I          | Paris                     | Anne SIMON                  |
| 63     | Hôpital St- Louis                    | Paris                     | Jean-Michel MOLINA          |
| 64     | Hôpital Pierre Zobda Quitman         | Fort de France Martinique | Sylvie ABEL                 |
| 65     | CHU Angers                           | Angers                    | Jean-Marie CHENNEBAULT      |
| 67     | Hôpital saint André                  | Bordeaux                  | Philippe MORLAT             |
| 68     | Hôpital Pellegrin                    | Bordeaux                  | Jean-Marie RAGNAUD          |
| 70     | Hôpital Edouard Herriot              | Lyon                      | Jean-Michel LIVROZET        |
| 71/ 98 | Hôpital de la Croix Rousse           | Lyon                      | Patrick MIALHES             |
| 73     | Hôpital Bichat Claude Bernard        | Paris                     | Patrick YENI                |
| 75     | Hôpital Gui de Chauviac              | Montpellier               | Jacques REYNES              |
| 76     | Hôpital de l'hôtel Dieu              | Nantes                    | François RAFFI              |
| 78     | Hôpital de l'Archet 1                | Nice                      | Anne LEPLATOIS              |
| 81     | Hôpital Pontchaillou                 | Rennes                    | Faouzi SOUALA               |
| 84     | CHU Bretonneau                       | Tours                     | Guillaume GRAS              |
| 85     | Hôpital Purpan                       | Toulouse                  | Lise CUZIN                  |
| 90     | Centre hospitalier de Tourcoing      | Tourcoing                 | Antoine CHERET              |
| 91     | Hôpital de la Conception             | Marseille                 | Isabelle RAVAUx             |
| 92     | Hôpital de Bradois de Nancy          | Nancy                     | Thierry MAY                 |
| 93     | CHU Charles Nicolle                  | Rouen                     | Yasmine DEBAB               |
| 113    | Hôpital Mignot                       | Le Chesnay                | Alix GREder BELAN           |
| 151    | Hôpital La Grave                     | Toulouse                  | François PREVOTEAU DU CLARY |
| 196    | Hôpital Ambroise Paré                | Marseille                 | Patrick PHILIBERT           |
